# Supplementary material
Source: MDPI journal article supplement (https://www.mdpi.com/2071-1050/11/9/2506)
Supplement: s1 [file s1]

## Supplementary

### Case studies included in the analysis

Below are the references of 68 case studies used in the definition of factors that facilitate and inhibit CBT. Some references are listed two or three times because they include different case studies.

1. Amati, C. (2013). "We all voted for it": experiences of participation in community-based ecotourism from the foothills of Mt Kilimanjaro. *Journal of Eastern African Studies*, 7(4), 650-670.
2. Anand, A., Chandan, P., & Singh, R.B. (2012). Homestays at Korzok: Supplementing rural livelihoods and supporting green tourism in the Indian Himalayas. *Mountain Research and Development*, 32(2), 126-136.
3. Avila Foucat, V.S. (2002). Community-based ecotourism management moving towards sustainability, in Ventanilla, Oaxaca, Mexico. *Ocean & Coastal Management*, 45(8), 511-529.
4. Belsky, J.M. (1999). Misrepresenting communities: The politics of community-based rural ecotourism in Gales Point Manatee, Belize. *Rural Sociology*, 64(4), 641-666.
5. Borges Lima, I., & d'Hautesserre A.M. (2011). Community capitals and ecotourism for enhancing Amazonian forest livelihoods. *Anatolia*, 22(2), 184-203.
6. Bruyere, B.L., Beh, A.W., & Lelengula, G. (2009). Differences in perceptions of communication, tourism benefits, and management issues in a protected area of rural Kenya. *Environmental Management*, 43(1), 49-59.
7. Charnley, S. (2005). From nature tourism to Ecotourism? The case of the Ngorongoro Conservation Area, Tanzania. *Human Organization*, 64(1), 75-88.
8. Chili, N.S., & Ngxongo, N.A. (2017). Challenges to active community involvement in tourism development at Didima Resort – a case study of Umhlwazini community in Bergville. *African Journal of Hospitality, Tourism and Leisure*, 6(2), 1-15.
9. Clements, T., John, A., Nielsen, K., Vicheka, C., Sokha, E., & Piseth, M. (2008). Translinks case study: Tmatboey community-based ecotourism project, Cambodia. Phnom Penh: Wildlife Conservation Society TransLinks Program.
10. Cobbinah, P.B., Black, R., & Thwaites, R. (2015). Ecotourism implementation in the Kakum Conservation Area, Ghana: administrative framework and local community experiences. *Journal of Ecotourism*, 14(2-3), 223-242.
11. Cole, S. (2006). Information and empowerment: The keys to achieving sustainable tourism. *Journal of Sustainable Tourism*, 14(6), 629-644.
12. Colvin, J.G. (1994). Capirona: A model of indigenous ecotourism. *Journal of Sustainable Tourism*, 2(3), 174-177.
13. Gascón, J. (2013). The limitations of community-based tourism as an instrument of development cooperation: the value of the Social Vocation of the Territory concept. *Journal of Sustainable Tourism*, 21(5), 716-731.
14. Giampiccoli, A., Jugmohan, S., & Mtapuri, O. (2014). International cooperation, community-based tourism and capacity building: Results from a Mpondoland village in South Africa. *Mediterranean Journal of Social Sciences*, 5(23), 657-667.
15. Grieves, M., Adler, M., & King, R. (2014). To preserve the mountains and the community: Indigenous ecotourism as a sustainable development strategy. *Social Thought and Research*, 33, 83-111.
16. He, G., Chen, X., Liu, W., Bearer, S., Zhou, S., Cheng, L. Y., ... Liu, J. (2008). Distribution of economic benefits from ecotourism: A case study of Wolong Nature Reserve for Giant Pandas in China. *Environmental Management*, 42(6), 1017-1025.
17. Hernandez Cruz, R.E., Bello Baltazar, E., Montoya Gomez, G., & Estrada Lugo, E.I.J. (2005). Social adaptation: Ecotourism in the Lacandon forest. *Annals of Tourism Research*, 32(3), 610-627.

18. Hitchner, S.L., Apu, F.L., Tarawe, L., Aran, S.G.N., & Yesaya, E. (2009) Community-based transboundary ecotourism in the heart of Borneo: a case study of the Kelabit Highlands of Malaysia and the Kerayan Highlands of Indonesia. *Journal of Ecotourism*, 8(2), 193-213.
19. Jamal, T., & Stronza, A. (2009). Collaboration theory and tourism practice in protected areas: stakeholders, structuring and sustainability. *Journal of Sustainable Tourism*, 17(2), 169-189.
20. Jitpakdee, R., & Thapa, G.B. (2012). Sustainability analysis of ecotourism on Yao Noi Island, Thailand. *Asia Pacific Journal of Tourism Research*, 17(3), 301-325.
21. Jones, S. (2005). Community-based ecotourism: The significance of social capital. *Annals of Tourism Research*, 32(2), 303-324.
22. Knight, D.W., & Cottrell, S.P. (2016). Evaluating tourism-linked empowerment in Cuzco, Peru. *Annals of Tourism Research*, 56, 32-47.
23. Kontogeorgopoulos, N., Churyen, A., & Duangsaeng, V. (2014). Success factors in community-based tourism in Thailand: The role of luck, external support, and local leadership. *Tourism Planning & Development*, 11(1), 106-124.
24. Lapeyre, R. (2010). Community-based tourism as a sustainable solution to maximise impacts locally? The Tsiseb Conservancy case, Namibia, *Development Southern Africa*, 27(5), 757-772.
25. Lenao, M. (2015). Challenges facing community-based cultural tourism development at Lekhubu Island, Botswana: a comparative analysis. *Current Issues in Tourism*, 18(6), 579-594.
26. Lepp, A. (2007). Residents' attitudes towards tourism in Bigodi village, Uganda. *Tourism Management*, 28(3), 876-885.
27. Matarrita-Cascante, D., Brennan, M.A., & Luloff, A.E. (2010). Community agency and sustainable tourism development: the case of La Fortuna, Costa Rica. *Journal of Sustainable Tourism*, 18(6), 735-756.
28. Ramos, A., & Prideaux, B. (2014). Indigenous ecotourism in the Mayan rainforest of Palenque: empowerment issues in sustainable development. *Journal of Sustainable Tourism*, 22(3), 461-479.
29. Mitchell, R.E. & Eagles, P.F.J. (2001). An integrative approach to tourism: lessons from the Andes of Peru. *Journal of Sustainable Tourism*, 9(1), 4-28.
30. Mitchell, R.E. & Eagles, P.F.J. (2001). An integrative approach to tourism: lessons from the Andes of Peru. *Journal of Sustainable Tourism*, 9(1), 4-28.
31. Moswete, N., Thapa, B., & Child, B. (2012). Attitudes and opinions of local and national public sector stakeholders towards Kgalagadi Transfrontier Park, Botswana. *International Journal of Sustainable Development & World Ecology*, 19(1), 67-80.
32. Moswete, N., Thapa, B., & Lacey, G. (2009). Village-based tourism and community participation: A case study of the Matsheng villages in southwest Botswana. In J. Saarinen, F. Becker, H. Manwa, & D. Wilson (Eds.), *Sustainable tourism in Southern Africa: Local communities and natural resources in transition* (pp. 189–209). Clevedon: Channelview.
33. Nelson, F. (2004). The evolution and impacts of community-based ecotourism in northern Tanzania. Issue paper no. 131. London: International Institute for Environment and Development.
34. Nelson, F. (2004). The evolution and impacts of community-based ecotourism in northern Tanzania. Issue paper no. 131. London: International Institute for Environment and Development.
35. Nelson, F. (2004). The evolution and impacts of community-based ecotourism in northern Tanzania. Issue paper no. 131. London: International Institute for Environment and Development.
36. Nguangchaiyapoom, S., Yongvanit, S., & Sripun, M. (2012). Community-based tourism management of Ban Prasat, Non Sung District, Nakhon Ratchasima Province, Thailand. *Manusat Sangkomsaet [Humanities and Social Sciences]*, 29(3), 191–207.
37. Nyaupane G.P., Morais, D.B., & Dowler, L. (2006). The role of community involvement and number/type of visitors on tourism impacts: A controlled comparison of Annapurna, Nepal and Northwest Yunnan, China. *Tourism Management*, 27, 1373-1385.
38. Nyaupane G.P., Morais, D.B., & Dowler, L. (2006). The role of community involvement and number/type of visitors on tourism impacts: A controlled comparison of Annapurna, Nepal and Northwest Yunnan, China. *Tourism Management*, 27, 1373-1385.

39. Ogutu, Z.A. (2002). The impact of ecotourism on livelihood and natural resource management in Eselenkei, Amboseli ecosystem, Kenya. *Land Degradation & Development*, 13, 251-256.
40. Okazaki, E. (2008). A community-based tourism model: Its conception and use. *Journal of Sustainable Tourism*, 16(5), 511-529.
41. Paimin, N.F.V., Modilih, S., Mogindol, S.H., Johnny, C., & Thamburaj, J.A. (2014). Community participation and barriers in rural tourism: a case study in Kiulu, Sabah. *Web of Conferences*, 12, 1-7.
42. Pawson, S., D'Arcy, P., & Richardson, S. (2017). The value of community-based tourism in Banteay Chhmar, Cambodia. *Tourism Geographies*, 19(3), 378-397.
43. Prachvuthy, M. (2006). Tourism, poverty, and income distribution: Chambok community-based ecotourism development, Kirirom National Park, Kompong Speu Province, Cambodia. *Journal of Greater Mekong Subregion Development Studies*, 3(1), 25-40.
44. Reimer, J.K., Walter, P. (2013). How do you know it when you see it? Community-based ecotourism in the Cardamom Mountains of southwestern Cambodia. *Tourism Management*, 34, 122-132.
45. Rozemeijer, N. (2000). Community-based tourism in Botswana: The SNV experience in 3 community tourism projects. Gaborone: SNV/IUCN CBNRM Support Programme.
46. Rozemeijer, N. (2000). Community-based tourism in Botswana: The SNV experience in 3 community tourism projects. Gaborone: SNV/IUCN CBNRM Support Programme.
47. Rozemeijer, N. (2000). Community-based tourism in Botswana: The SNV experience in 3 community tourism projects. Gaborone: SNV/IUCN CBNRM Support Programme.
48. Saufi, A., O'Brien, D., & Wilkins, H. (2014). Inhibitors to host community participation in sustainable tourism development in developing countries. *Journal of Sustainable Tourism*, 22(5), 801-820.
49. Sebele, L.S. (2010). Community-based tourism ventures, benefits and challenges: Khama Rhino Sanctuary Trust, Central District, Botswana. *Tourism Management*, 31, 136-146.
- Stone, L.S., & Stone, T.M. (2011). Community based tourism enterprises: challenges and prospects for community participation; Khama Rhino Sanctuary Trust, Botswana. *Journal of Sustainable Tourism*, 19(1), 97-114.
50. Somarriba-Chang, M., & Gunnarsdotter, Y. (2012). Local community participation in ecotourism and conservation issues in two nature reserves in Nicaragua. *Journal of Sustainable Tourism*, 20(8), 1025-1043.
51. Somarriba-Chang, M., & Gunnarsdotter, Y. (2012). Local community participation in ecotourism and conservation issues in two nature reserves in Nicaragua. *Journal of Sustainable Tourism*, 20(8), 1025-1043.
52. Ellis, S. (2011). Community based tourism in Cambodia: exploring the role of community for successful implementation in least developed countries. PhD Thesis, Edith Cowan University. Retrieved from <http://ro.ecu.edu.au/theses/451>
53. Southgate, C.R.J. (2006). Ecotourism in Kenya: the vulnerability of communities. *Journal of Ecotourism*, 5(1-2), 80-96.
54. Stronza, A.L. (2010). Commons management and ecotourism: ethnographic evidence from the Amazon. *International Journal of the Commons*, 4(1), 56-77.
55. Sundjaya (2005). Mangrove conservation through ecotourism development by the Bobongko people in the Togeian Islands, Indonesia. In J. Velasquez (Ed.), *Innovative communities: people-centred approaches to environmental management in the Asia-Pacific region* (pp. 182-203). Tokyo: United Nations University Press.
56. Jamieson, W., & Sunalai, P. (2005). Sustainable tourism planning and management in Klong Khwang, Thailand. In J. Velasquez (Ed.), *Innovative communities: people-centred approaches to environmental management in the Asia-Pacific region* (pp. 158-181). Tokyo: United Nations University Press.
57. Timothy, D.J., & White, K. (1999). Community-based ecotourism development on the periphery of Belize. *Current Issues in Tourism*, 2(2-3), 226-242.

58. Wang, C.C., Cater, C., & Low, T. (2016). Political challenges in community-based ecotourism. *Journal of Sustainable Tourism*, 24(11), 1555-1568.
59. Wunder, S. (1999). Promoting forest conservation through ecotourism income? A case study from the Ecuadorian Amazon region. Occasional paper No. 21. Jakarta: Center for International Forestry Research.
60. Wunder, S. (1999). Promoting forest conservation through ecotourism income? A case study from the Ecuadorian Amazon region. Occasional paper No. 21. Jakarta: Center for International Forestry Research.
61. Wunder, S. (1999). Promoting forest conservation through ecotourism income? A case study from the Ecuadorian Amazon region. Occasional paper No. 21. Jakarta: Center for International Forestry Research.
62. Wunder, S. (1999). Promoting forest conservation through ecotourism income? A case study from the Ecuadorian Amazon region. Occasional paper No. 21. Jakarta: Center for International Forestry Research.
63. Yeboah, T. (2013). Assessing community participation in selected ecotourism projects in the Brong-Ahafo Region, Ghana. *Journal of Ecology and Natural Environment*, 5(7), 133-143.
64. Zanotti, L., & Chernela, J. (2008). Conflicting cultures of nature: ecotourism, education and the Kayapó of the Brazilian Amazon. *Tourism Geographies*, 10(4), 495-521.
65. Collins, S., & Snel, H. (2008). A perspective on community based tourism from South Africa: The TRANSFORM Programme, 1996-2007. In A. Spenceley (Ed.), *Responsible tourism: critical issues for conservation and development*. London: Earthscan.
66. Collins, S., & Snel, H. (2008). A perspective on community based tourism from South Africa: The TRANSFORM Programme, 1996-2007. In A. Spenceley (Ed.), *Responsible tourism: critical issues for conservation and development*. London: Earthscan.
67. Kim, S., Park, E., & Phandanouvong, T. (2014). Barriers to local residents' participation in community-based tourism: Lessons from Houay Kaeng village in Laos. *SHS Web of Conferences*, 12, 1-8.
68. Isaac, M., & Wuleka, K. (2012). Community-based ecotourism and livelihood enhancement in Sirigu, Ghana. *International Journal of Humanities and Social Science*, 2(18), 97-108.
